# Supplementary material for: Severe T cell hyporeactivity in ventilated COVID-19 patients correlates with prolonged virus persistence and poor outcomes
Source: Nat Commun. 2021 May 21;12:3006. doi: 10.1038/s41467-021-23334-2 (PMC8140132; doi:10.1038/s41467-021-23334-2)
Supplement: Supplementary file 1 — Supplementary Information [file 41467_2021_23334_MOESM1_ESM.pdf]

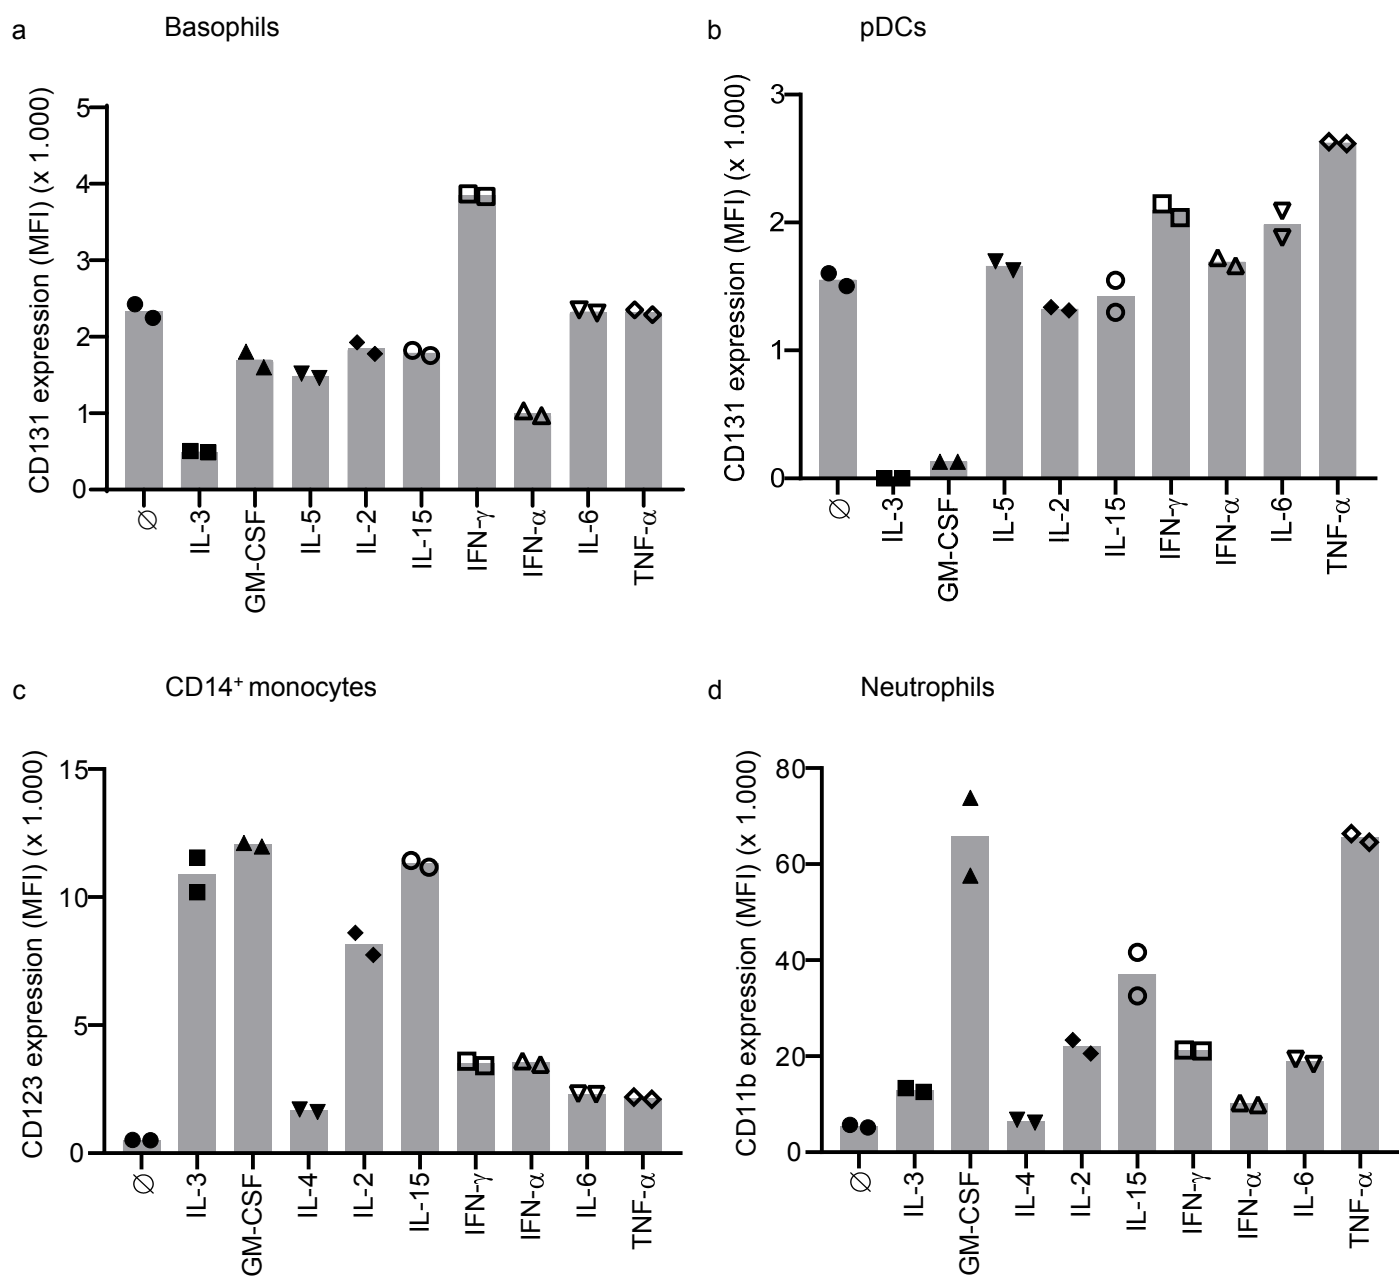

**Suppl. Fig. 1**

**Supplementary Fig. 1 Cytokine induced changes of surface markers in a whole blood assay. a-d**

Whole blood from a healthy donor was cultured in duplicates for 24 hours at 37°C with or without cytokines (IL-2, IL-3, IL-4, IL-5, IL-6, IL-15, GM-CSF, IFN- $\gamma$ , IFN- $\alpha$  and TNF- $\alpha$ , 20 ng/ml each). Samples were analyzed by flow cytometry and absolute values of indicated cell surface markers are depicted as mean fluorescence intensity (MFI). **a** Expression of CD131 on basophils. **b** Expression of CD131 on pDCs. **c** Expression of CD123 on CD14<sup>+</sup> monocytes. **d** Expression of CD11b on neutrophils. Bar graphs show mean values and each sample is represented by one dot. The experimental findings were successfully replicated twice. Source data are provided as a Source Data file.

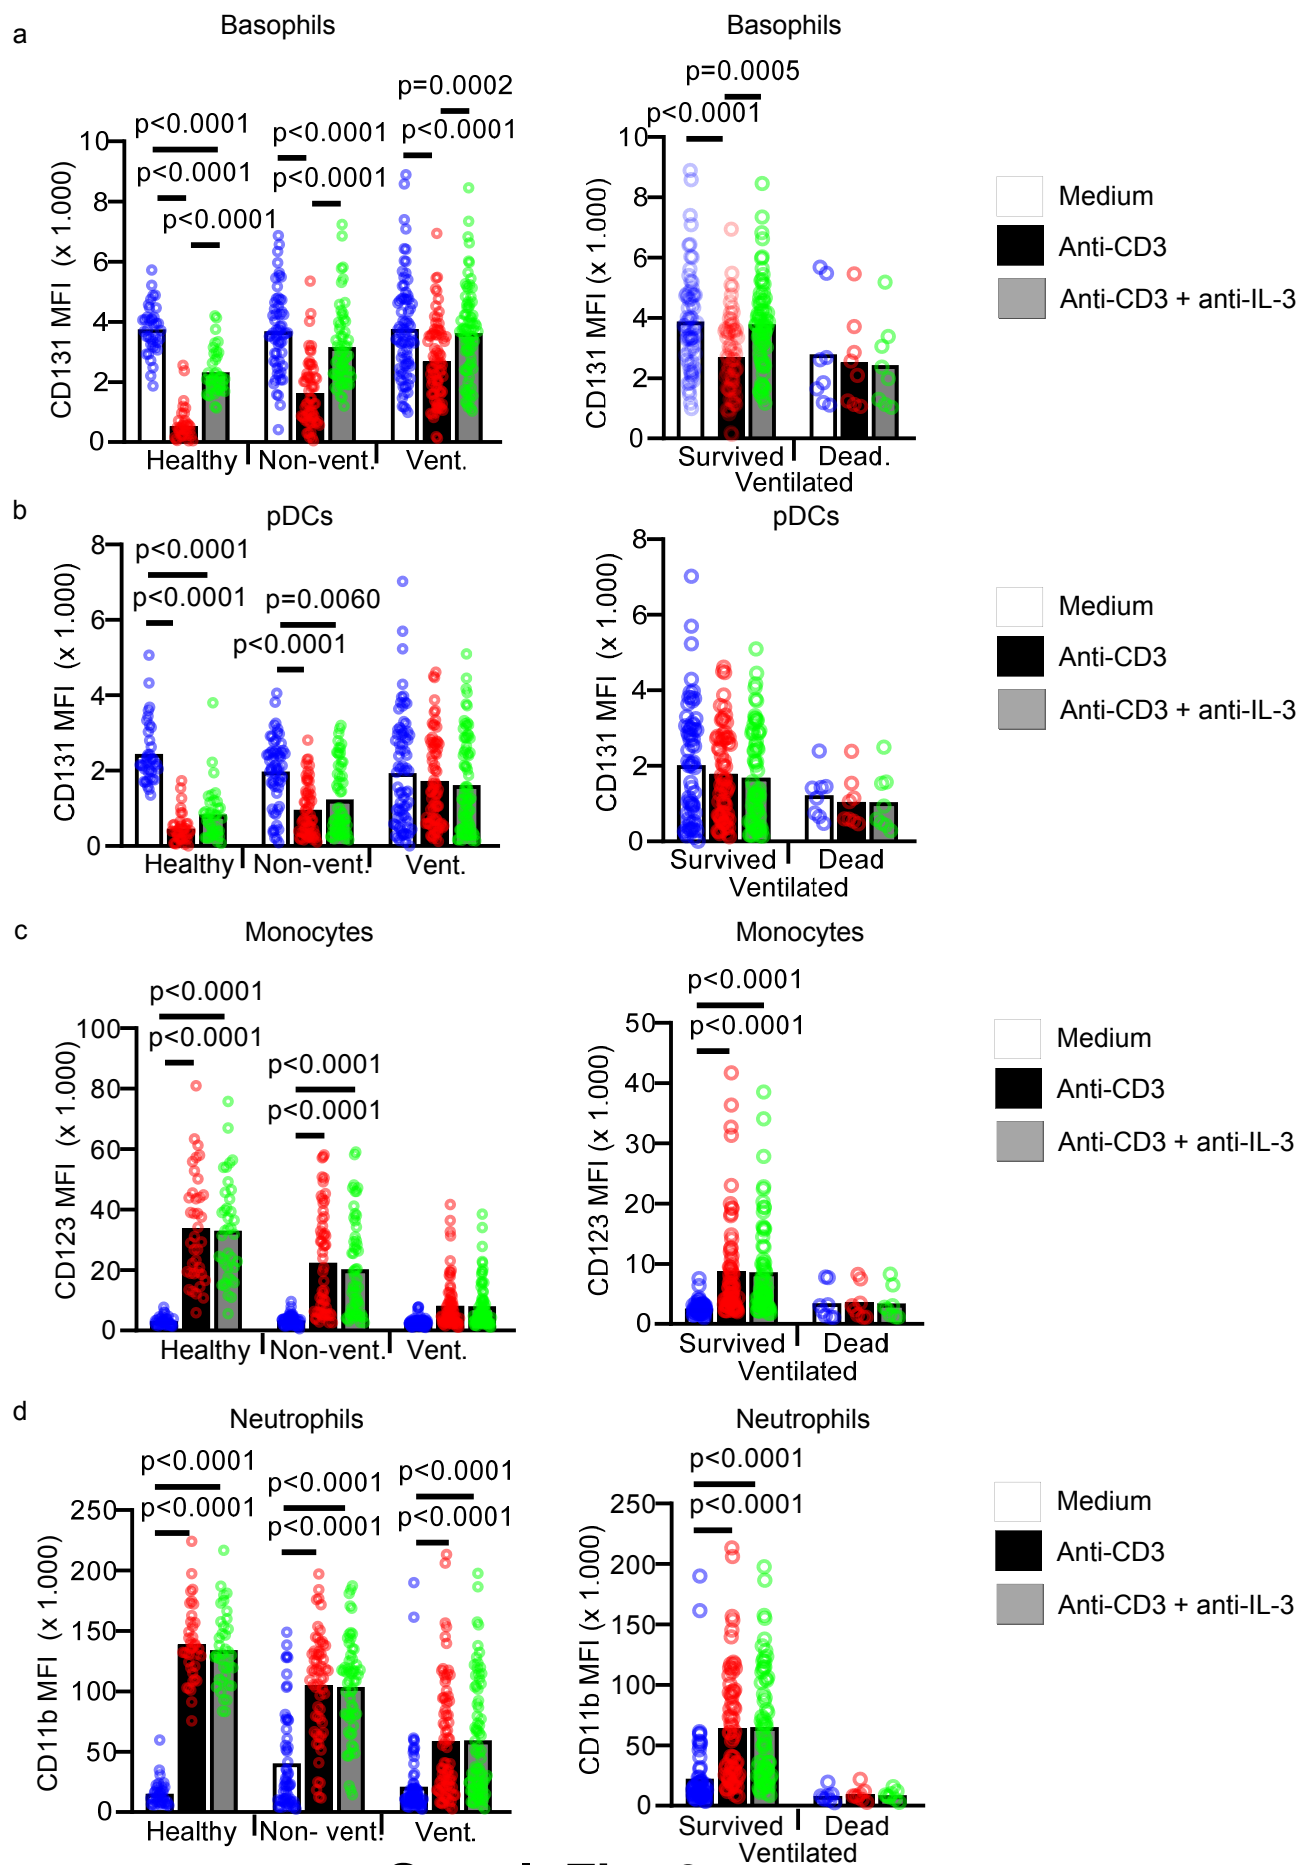

**Suppl. Fig. 2**

**Supplementary Fig. 2 T cell reactivity in COVID-19 patients and healthy controls. a-d** Whole blood from 38 healthy controls (Healthy; n=38 biologically independent samples), 33 non-ventilated (Non-vent.; n=58 biologically independent samples) and 21 mechanically ventilated (Vent.; n=77 biologically independent samples) COVID-19 patients was cultured without stimulation (medium), with immobilized anti-CD3, or with immobilized anti-CD3 plus anti-IL-3 (10 µg/ml) for 24h. Ventilated patients were stratified into “survived” (17 patients, n=69 biologically independent samples) and “dead” (4 patients, n=8 biologically independent samples). Expression of surface markers was quantified by flow cytometry and absolute expression values of indicated markers are shown as mean fluorescence intensity (MFI) on basophils (**a**), pDCs (**b**), CD14<sup>+</sup> monocytes (**c**) and neutrophils (**d**). Bar graphs show mean values and each sample is represented by one dot. One-way ANOVA with Bonferroni multiple comparison test was used and statistical significance is only shown for differences between medium, anti-CD3 and anti-CD3+anti-IL-3 within each group of individuals. Source data are provided as a Source Data file.

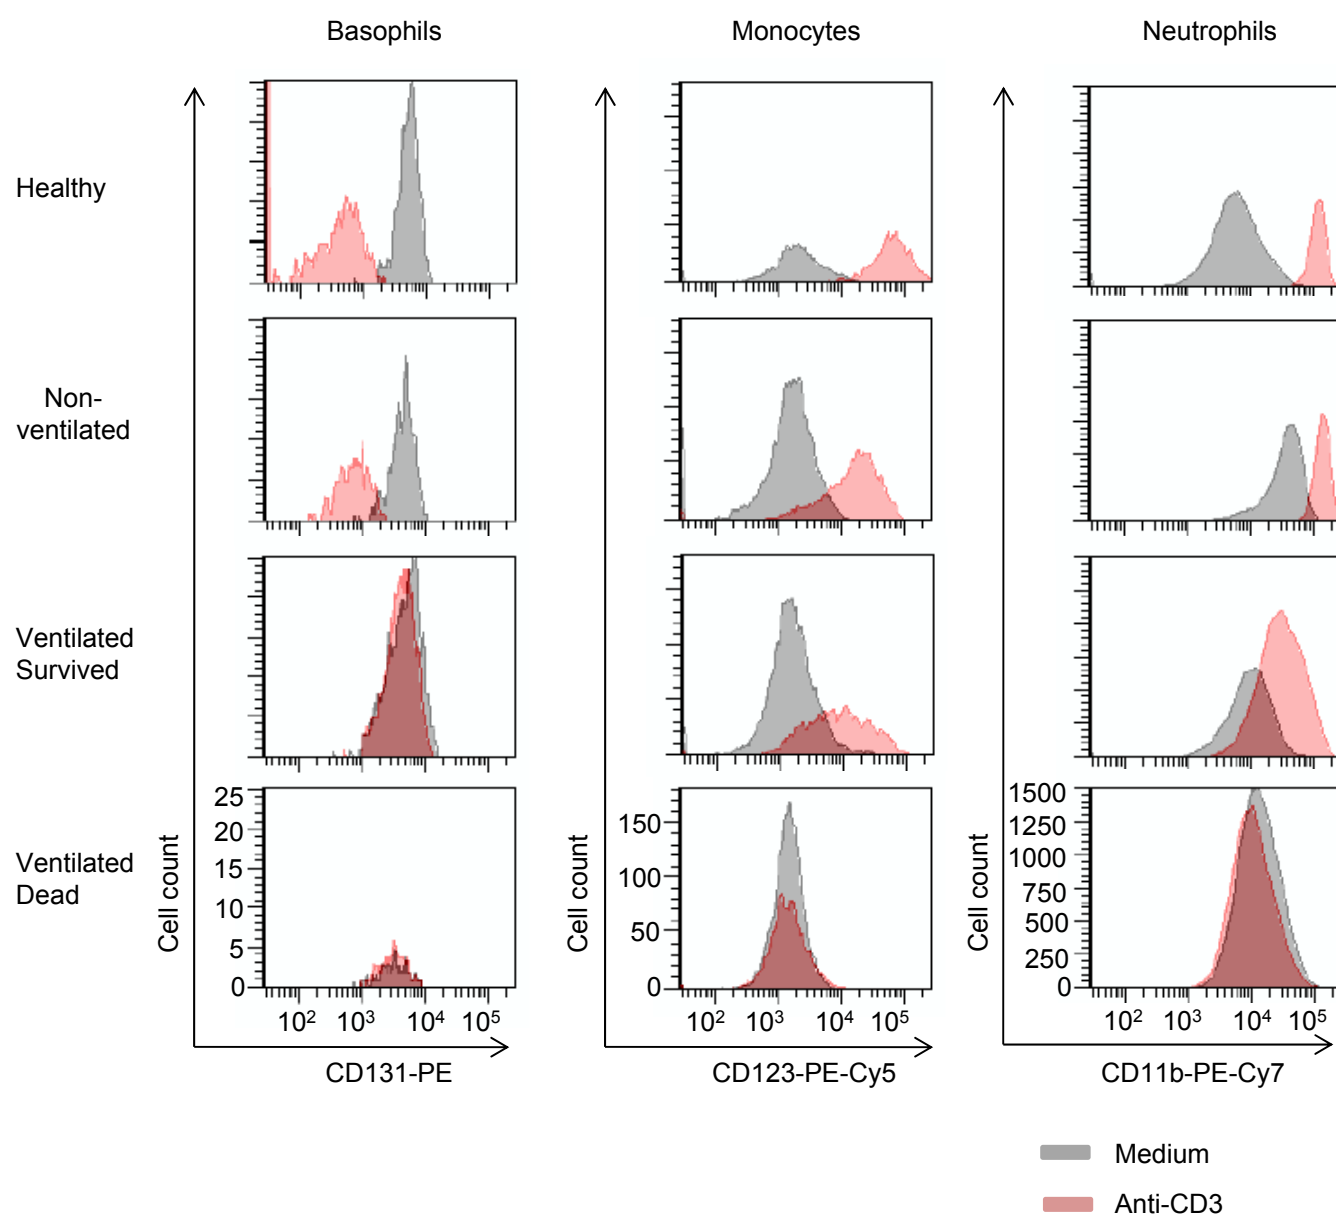

**Suppl. Fig. 3**

**Supplementary Fig. 3 Representative FACS histogram plots for whole blood stimulation.** Whole blood from various donors as indicated was cultured with (red) or without (grey) immobilized anti-CD3 for 24h. Expression of surface markers was quantified by flow cytometry and representative histogram plots are shown.

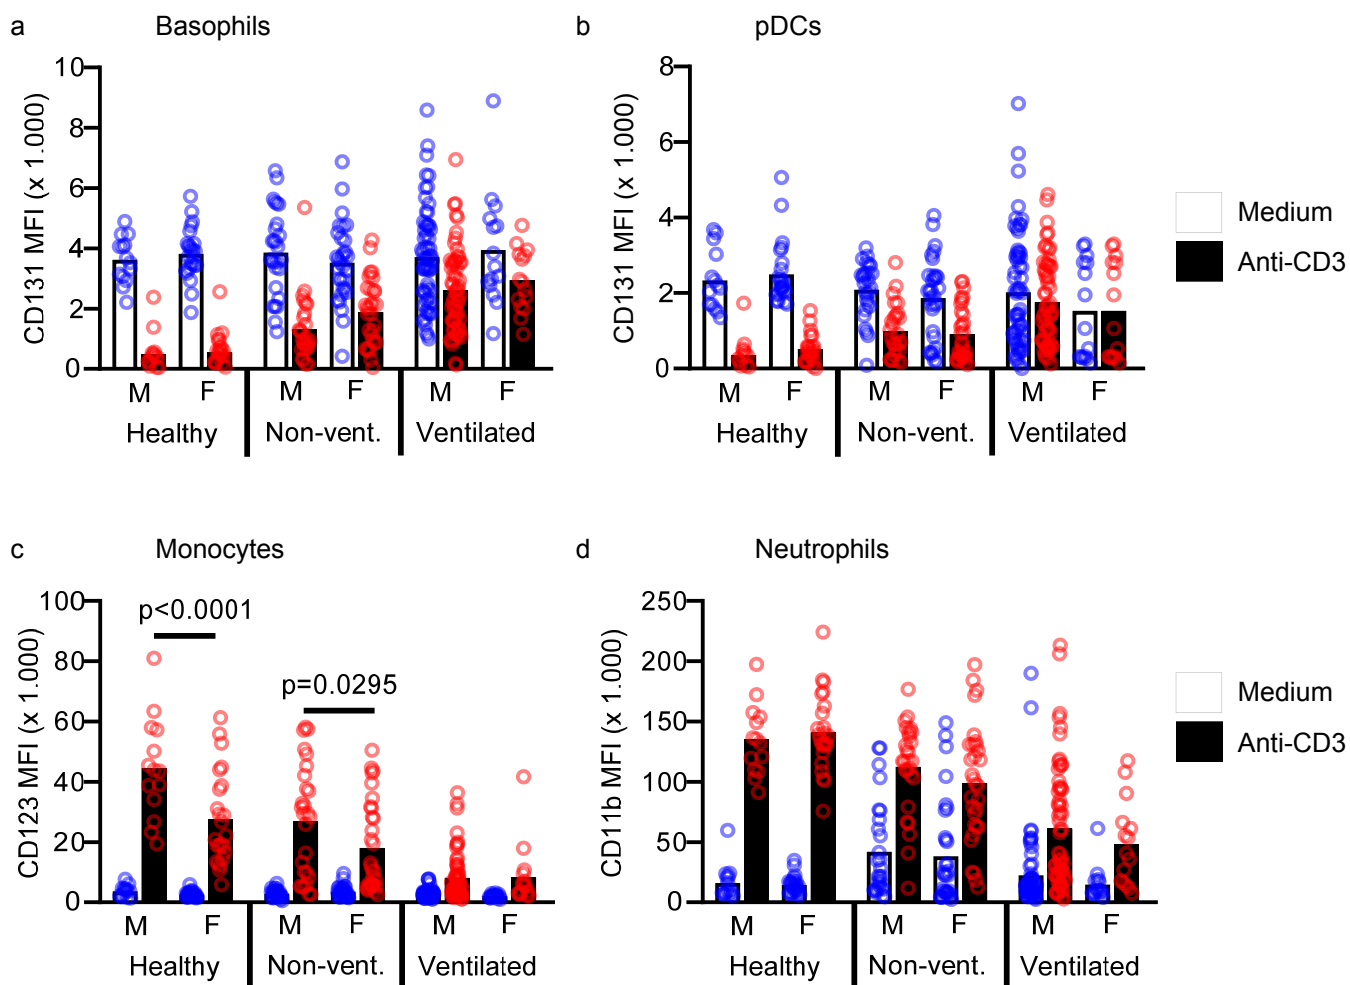

**Suppl. Fig. 4**

**Supplementary Fig. 4 Gender specific analysis of T cell activation and immunophenotypes. a-d**

Whole blood from healthy controls (n=14 biologically independent samples from 14 males and n=24 biologically independent samples from 24 females), non-ventilated COVID-19 patients (n=27 biologically independent samples from 16 males and n=31 biologically independent samples from 17 females) and mechanically ventilated COVID-19 patients (n=62 biologically independent samples from 16 males and n=15 biologically independent samples from 5 females) was cultured with or without immobilized anti-CD3 for 24h. Expression of surface markers was quantified by flow cytometry and absolute expression values of indicated markers are shown as mean fluorescence intensity (MFI) on basophils (**a**), pDCs (**b**), CD14<sup>+</sup> monocytes (**c**) and neutrophils (**d**). Bar graphs show mean values and each sample is represented by one dot. One-way ANOVA with Bonferroni multiple comparison test was used and statistical significance is only shown for differences between males and females within each group of individuals. Source data are provided as a Source Data file.

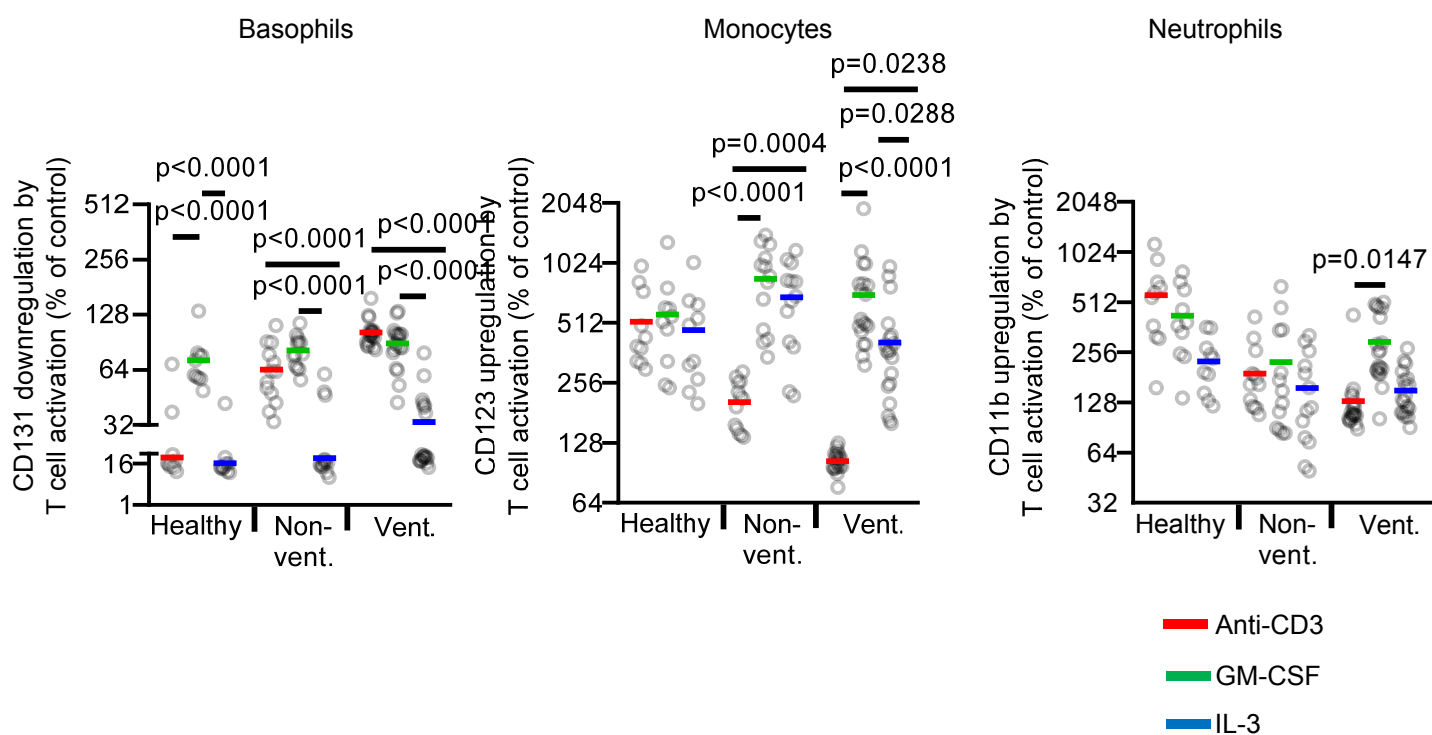

**Suppl. Fig. 5**

**Supplementary Fig. 5 Effector cells of COVID-19 patients are not anergic to IL-3 or GM-CSF.**

Whole blood samples from 10 healthy controls (Healthy; n=10 biologically independent samples), 13 non-ventilated (Non-vent; n=13 biologically independent samples) and 15 mechanically ventilated (Vent.; n=19 biologically independent samples) COVID-19 patients were cultured with medium, anti-CD3, GM-CSF (10 ng/ml) or IL-3 (10 ng/ml) for 24h. Expression of indicated surface markers was quantified by flow cytometry on basophils, CD14<sup>+</sup> monocytes and neutrophils. Values depict the ratio of surface marker expression with anti-CD3, GM-CSF or IL-3 to surface marker expression with medium alone. Each sample is represented by one dot and the mean is marked in red (anti-CD3), green (GM-CSF) or blue (IL-3). One-way ANOVA with Bonferroni multiple comparison test was used. Source data are provided as a Source Data file.

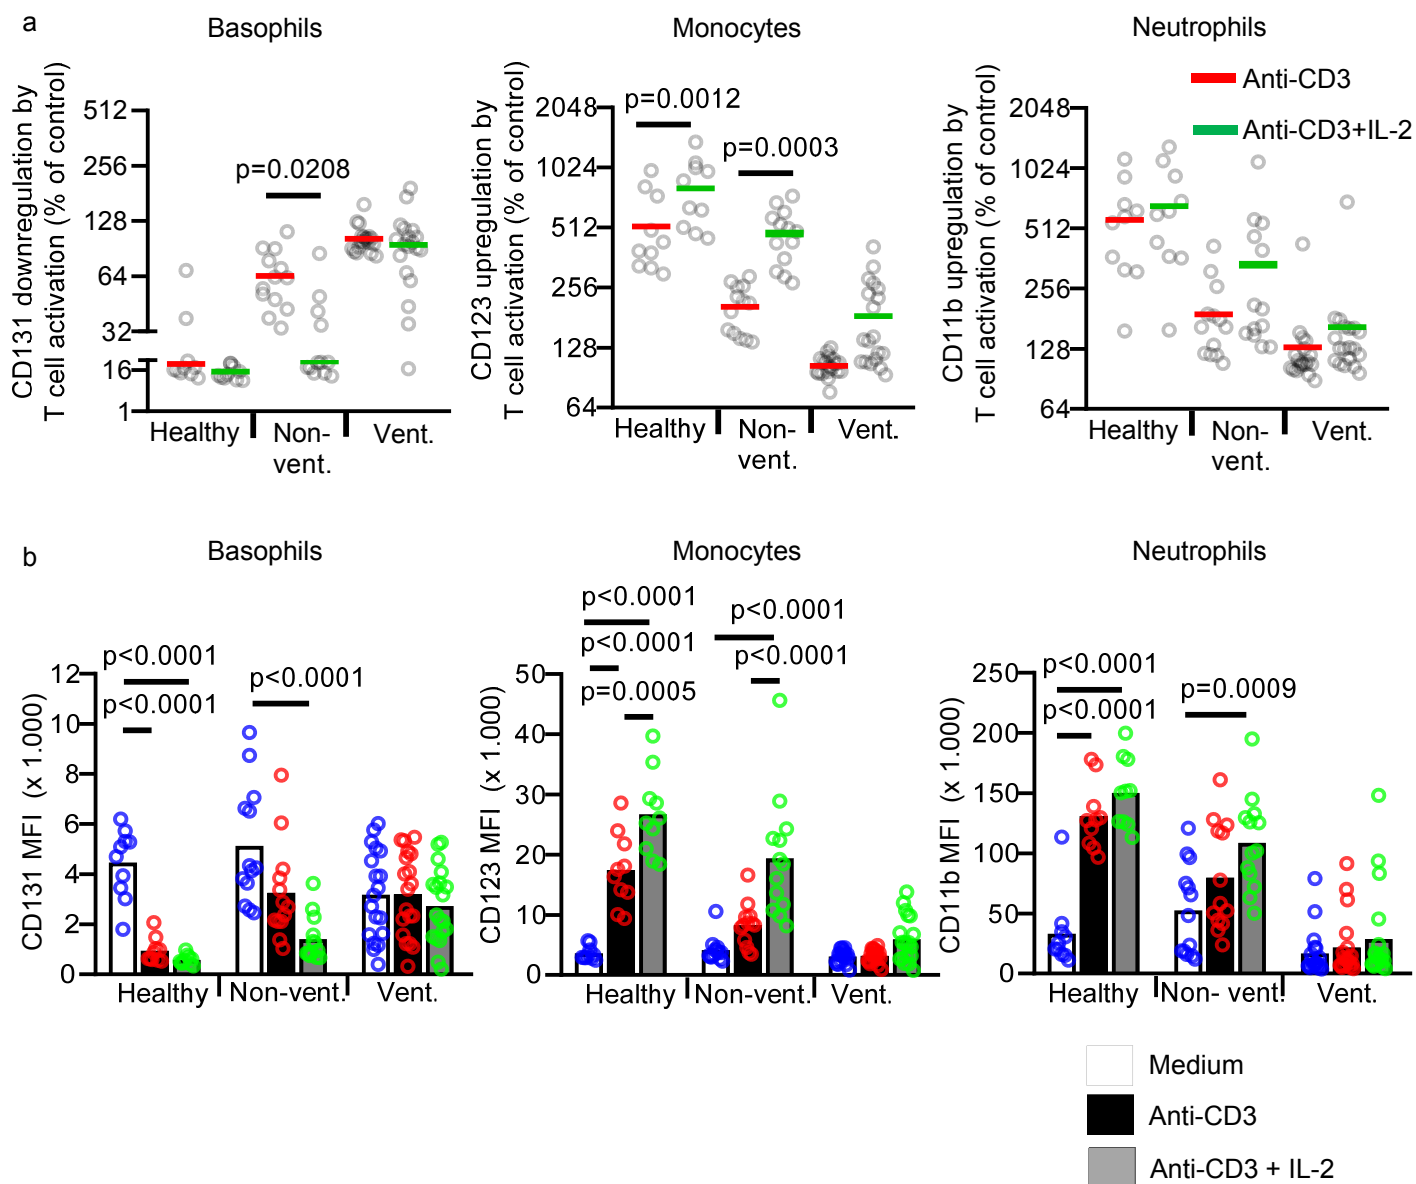

**Suppl. Fig. 6**

**Supplementary Fig. 6 Effect of IL-2 on T cell reactivity in COVID-19 patients and healthy controls. a-b** Whole blood samples from 10 healthy controls (Healthy; n=10 biologically independent samples), 13 non-ventilated (Non-vent; n=13 biologically independent samples) and 15 mechanically ventilated (Vent.; n=19 biologically independent samples) COVID-19 patients were cultured with medium alone, with anti-CD3 or with anti-CD3 plus IL-2 (20 ng/ml) for 24h. Expression of indicated surface markers was quantified by flow cytometry on basophils, CD14+ monocytes and neutrophils **(a)**. Values depict the ratio of surface marker expression with anti-CD3 or anti-CD3 plus IL-2 to surface marker expression without anti-CD3. Each sample is represented by one dot and the mean is marked in red (anti-CD3) or green (anti-CD3+IL-2). The absolute expression values of indicated markers are shown as mean fluorescence intensity (MFI) **(b)**. Bar graphs show mean values and each sample is represented by one dot. One-way ANOVA with Bonferroni multiple comparison test was used. Source data are provided as a Source Data file.

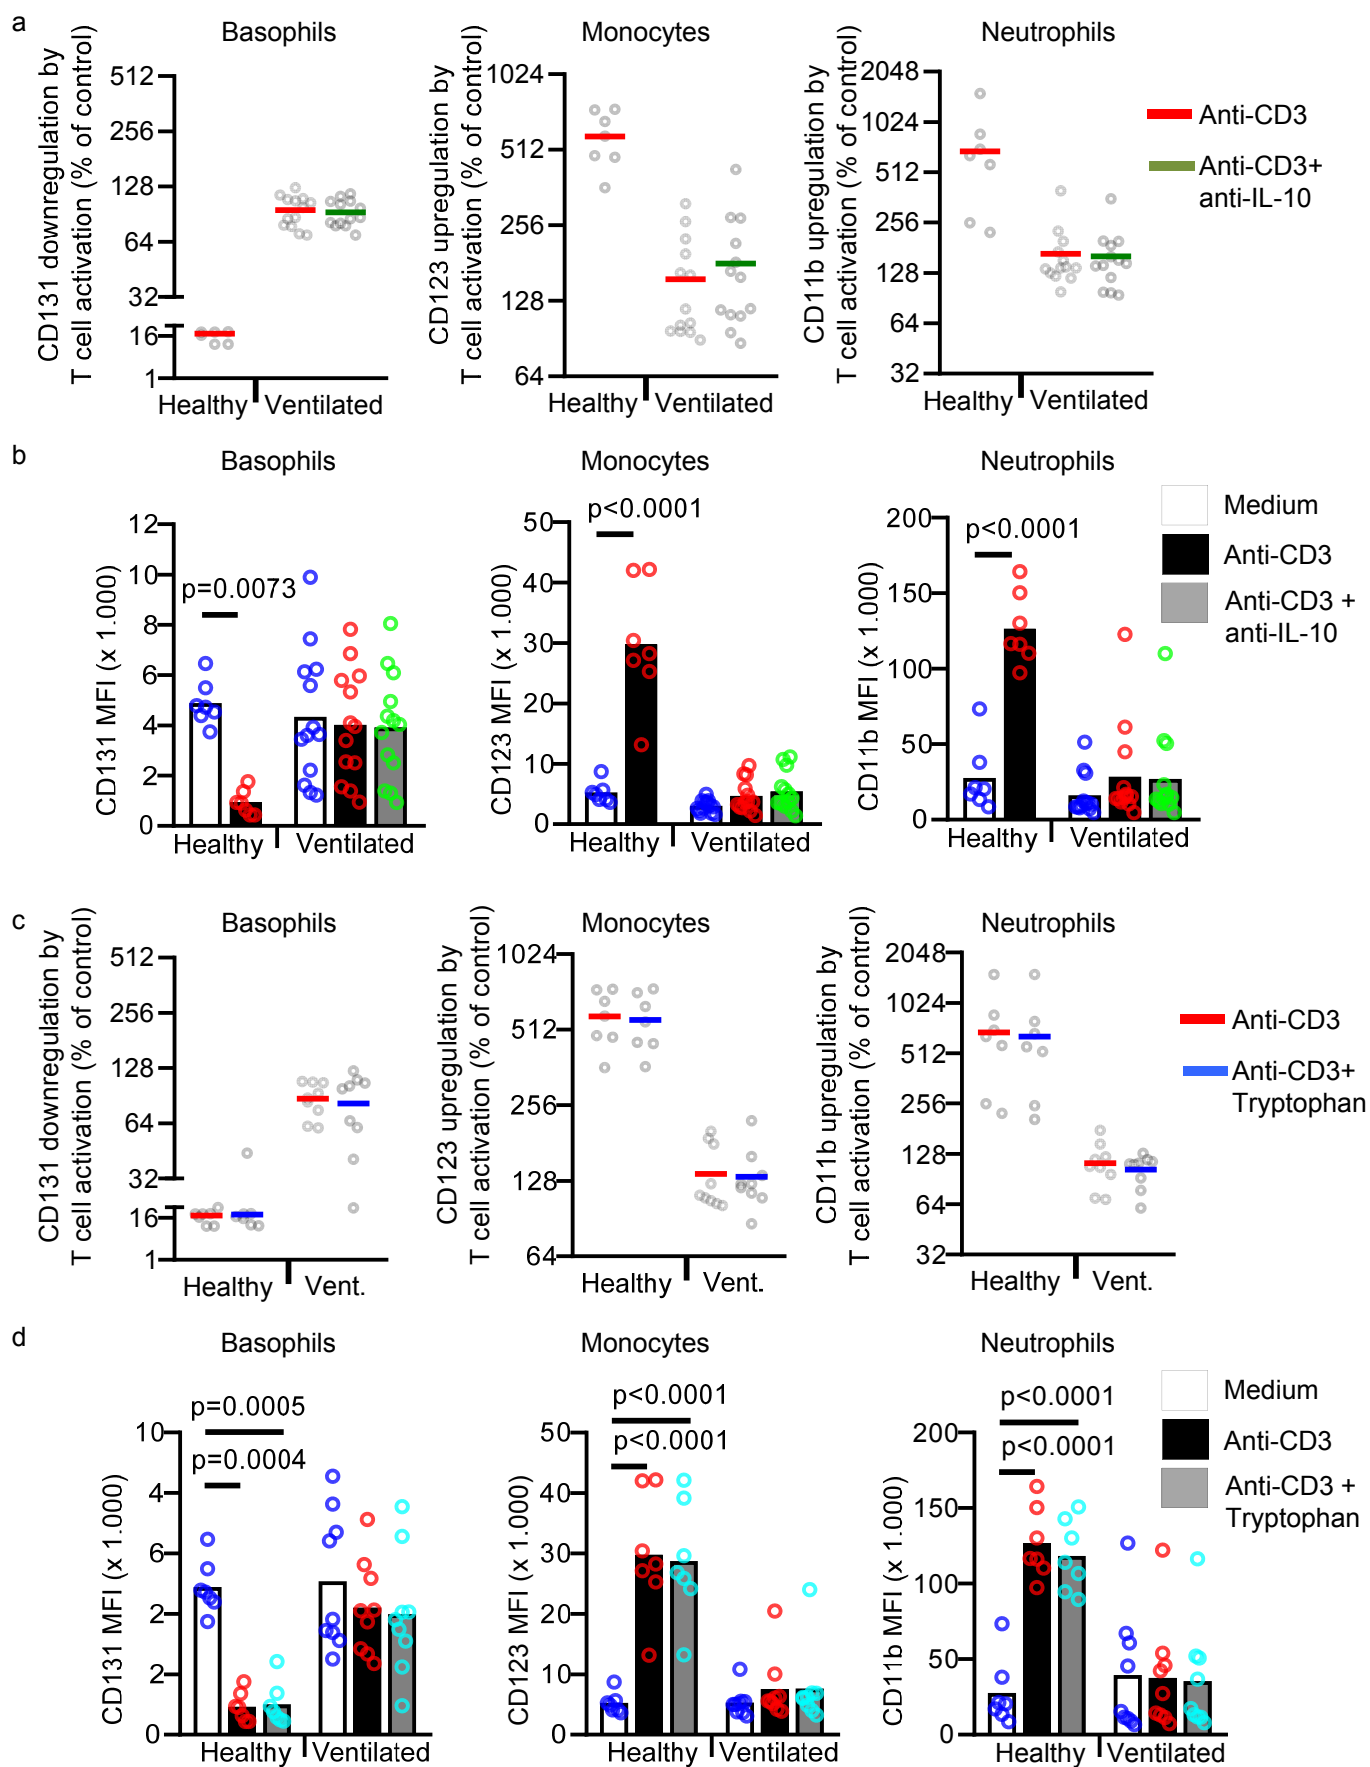

**Suppl. Fig. 7**

**Supplementary Fig. 7 IL-10 and tryptophan degradation do not explain T cell hyporeactivity in COVID-19 patients.** **a-b** Whole blood samples from 7 healthy controls (Healthy; n=7 biologically independent samples) and 13 mechanically ventilated (Vent.; n=13 biologically independent samples) COVID-19 patients were cultured with medium alone, with anti-CD3 or with anti-CD3 plus a blocking anti-IL-10 antibody (10 µg/ml) for 24h. Expression of indicated surface markers was quantified by flow cytometry on basophils, CD14+ monocytes and neutrophils. **(a)** Values depict the ratio of surface marker expression with anti-CD3 or anti-CD3 plus anti-IL-10 to surface marker expression without anti-CD3. Each sample is represented by one dot and the mean is marked in red (anti-CD3) or green (anti-CD3+anti-IL-10). **(b)** The absolute expression values of indicated markers are shown as mean fluorescence intensity (MFI). Bar graphs show mean values and each samples is represented by one dot. **c-d** Whole blood samples from 7 healthy controls (Healthy; n=7 biologically independent samples) and 9 mechanically ventilated (Vent.; n=9 biologically independent samples) COVID-19 patients were cultured with medium alone, with anti-CD3 or with anti-CD3 plus L-tryptophan (100 µg/ml) for 24h. Expression of indicated surface markers was quantified by flow cytometry on basophils, CD14+ monocytes and neutrophils. **(c)** Values depict the ratio of surface marker expression with anti-CD3 or anti-CD3 plus L-tryptophan to surface marker expression without anti-CD3. Each sample is represented by one dot and the mean is marked in red (anti-CD3) or blue (anti-CD3+L-tryptophan). The absolute expression values of indicated markers are shown as mean fluorescence intensity (MFI) **(d)**. Bar graphs show mean and each sample is represented by one dot. One-way ANOVA with Bonferroni multiple comparison test was used. Source data are provided as a Source Data file.

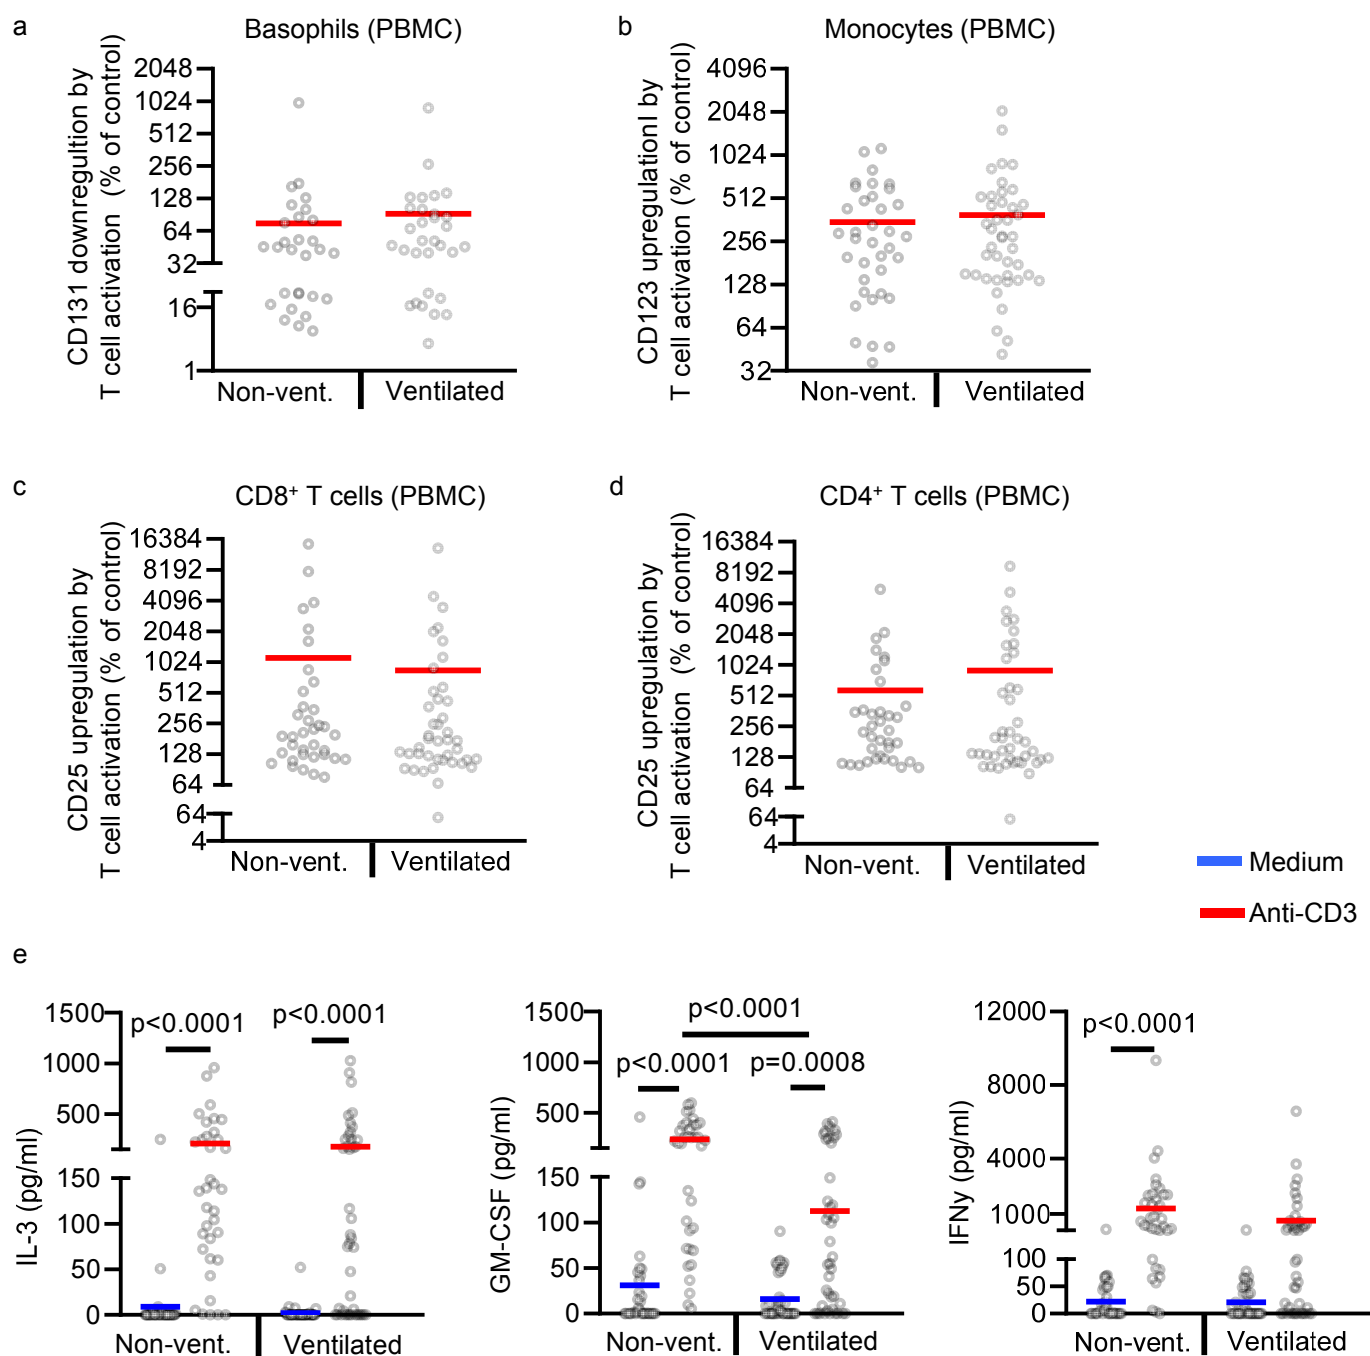

**Suppl. Fig. 8**

**Supplementary Fig. 8 T cell reactivity analyzed with PBMC from COVID-19 patients. a-e**

PBMCs from 25 non-ventilated COVID-19 patients (Non-vent.; n=36 biologically independent samples) and 16 mechanically ventilated COVID-19 patients (Ventilated, n=42 biologically independent samples) were cultured with or without anti-CD3 (5 µg/ml) for 24h. Analysis of basophils was not possible in all samples because basophil numbers were too low in some samples. Expression of indicated surface markers was quantified by flow cytometry on basophils (**a**), CD14<sup>+</sup> monocytes (**b**), CD8<sup>+</sup> T cells (**c**) and CD4<sup>+</sup> T cells (**d**). Values depict the ratio of surface marker expression with anti-CD3 to surface marker expression without anti-CD3 in percent. Each sample is represented by one dot and the mean is marked in red. **e** Concentrations of IL-3, GM-CSF and IFN-γ were measured in the culture supernatant by ELISA. Each sample is represented by one dot and the mean is marked in blue (Medium) or red (anti-CD3). 2-tailed unpaired t-test (a-d) or one-way ANOVA with Bonferroni multiple comparison test (e) was used. Source data are provided as a Source Data file.

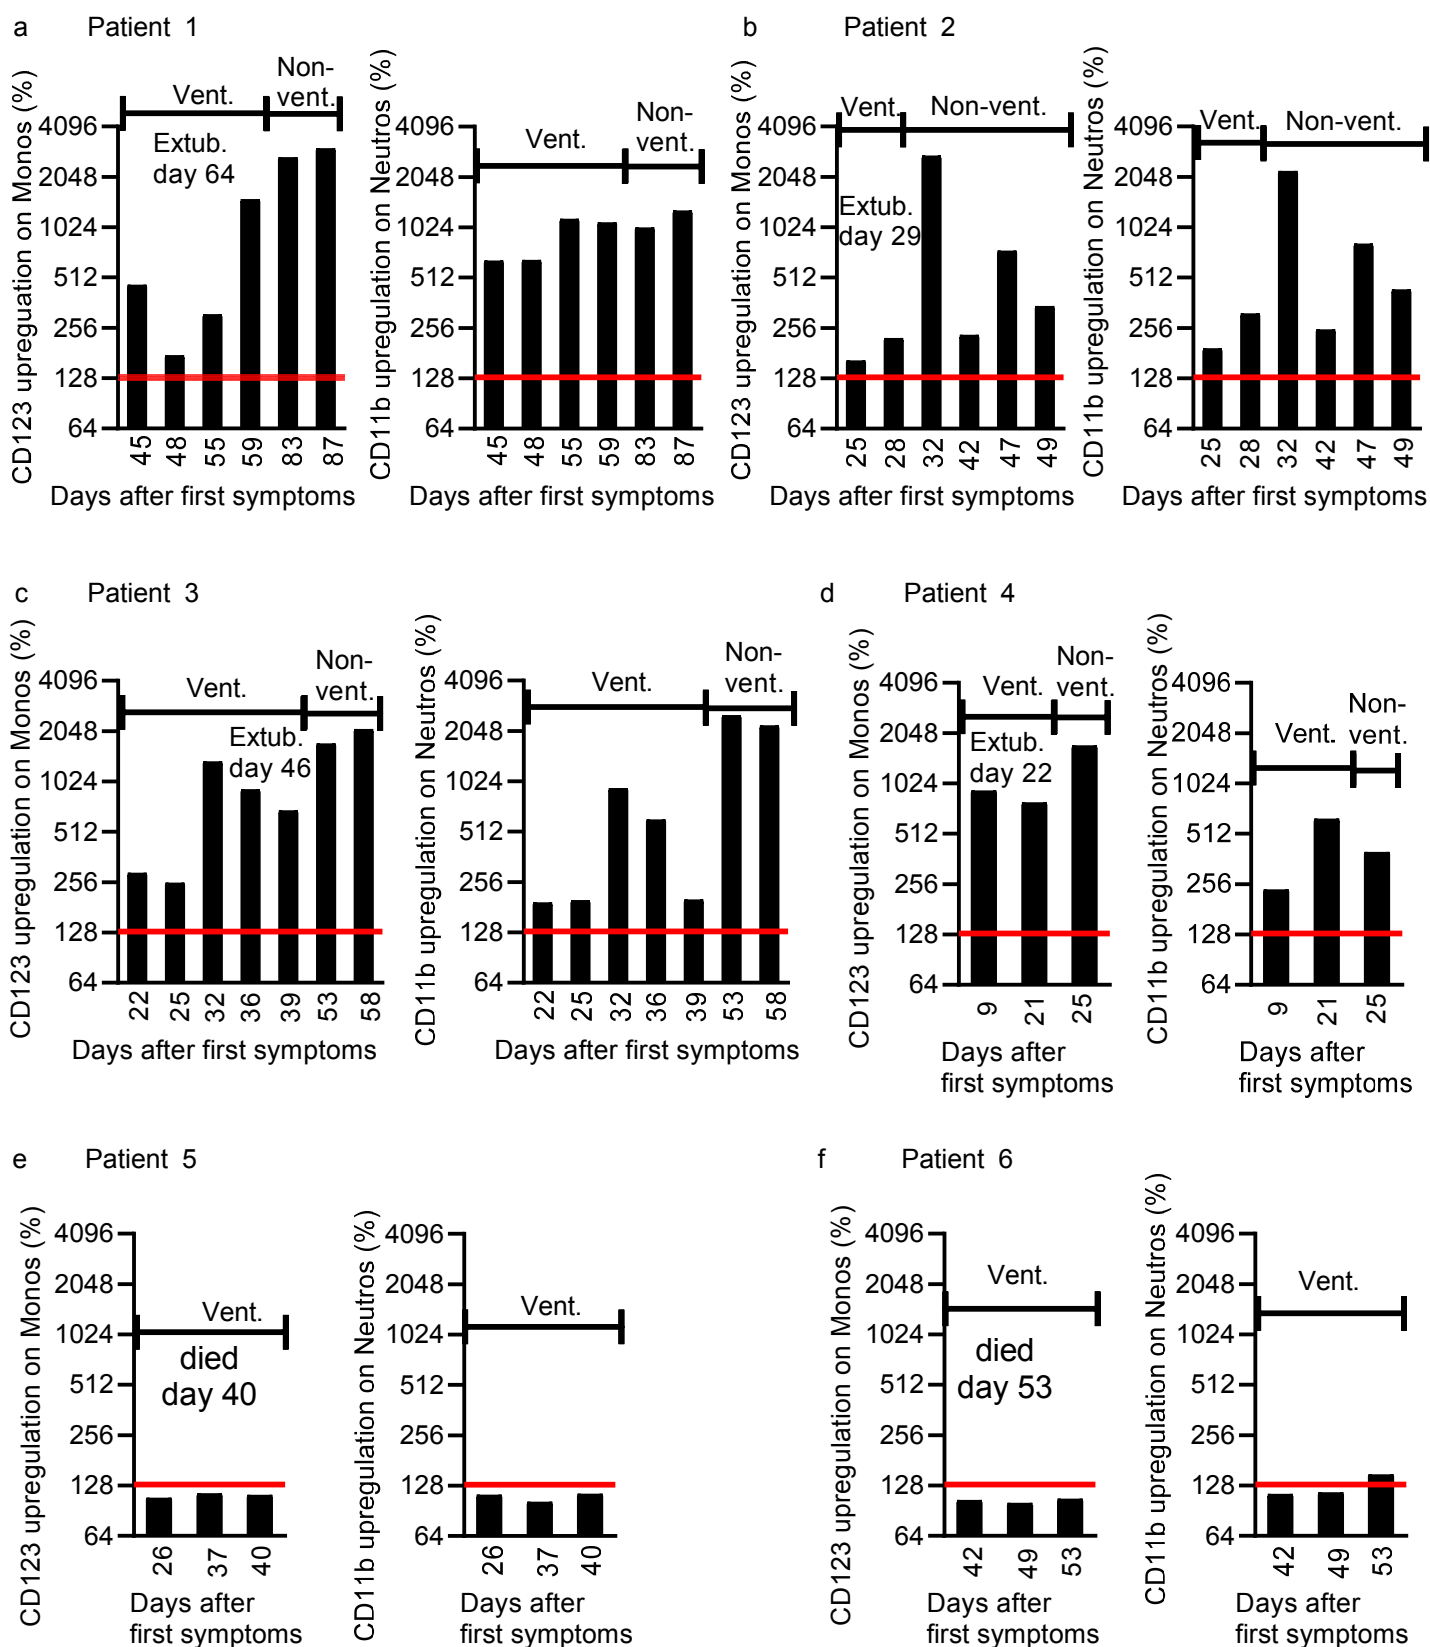

**Suppl. Fig. 9**

**Supplementary Fig. 9 Examples of longitudinal analysis of ventilated COVID-19 patients.**

Upregulation of CD123 on CD14+ monocytes and CD11b on neutrophils in whole blood cultures with immobilized anti-CD3. Values depict the ratio of surface marker expression with anti-CD3 to surface marker expression without anti-CD3. 4 patients could be weaned from mechanical ventilation (patient 1-4) and 2 patients died on the ICU (patient 5-6). Periods of ventilation and non-ventilation are marked as “Vent.” and “Non-vent”. The cut-off of 130% upregulation that was used for the predictive score is shown as red line. Source data are provided as a Source Data file.

### a Gating Singlets

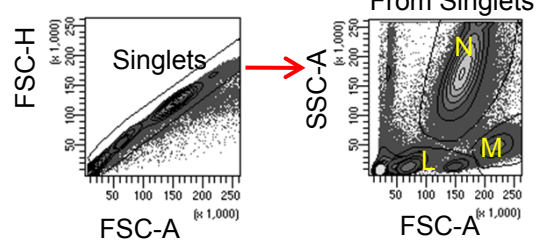

### b Panel 1

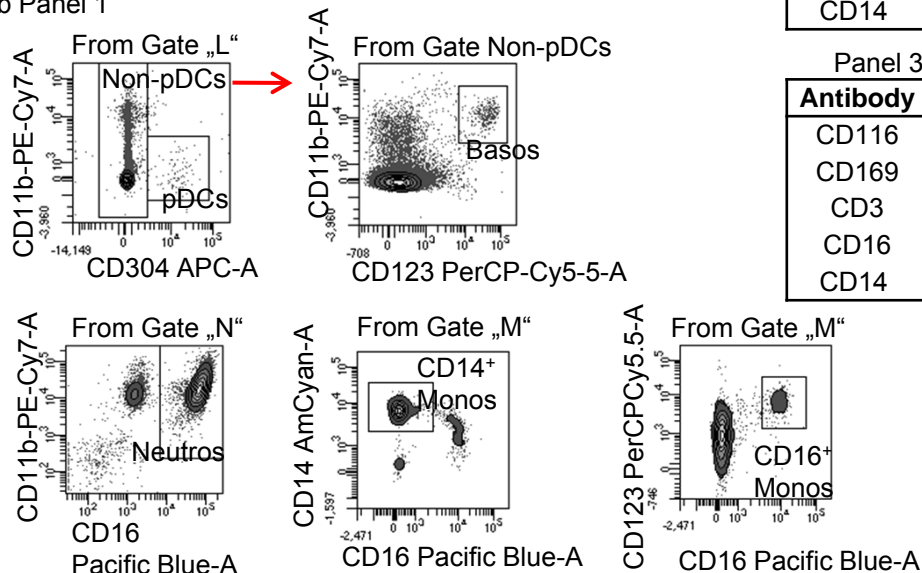

### c Panel 2

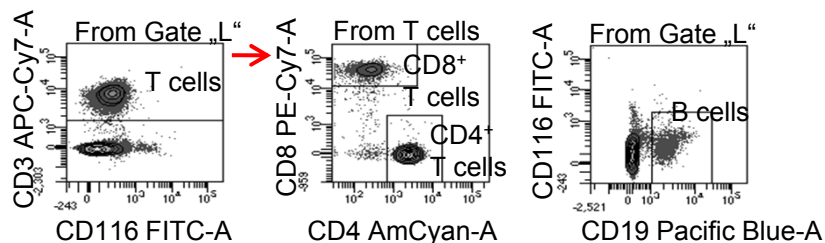

### d Panel 3

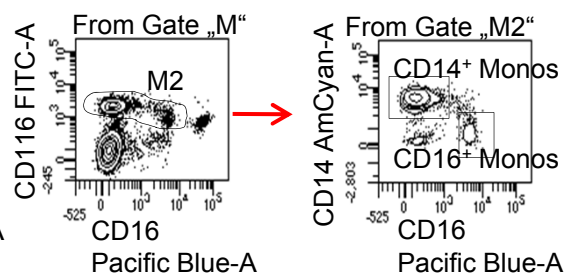

### e Panel 4

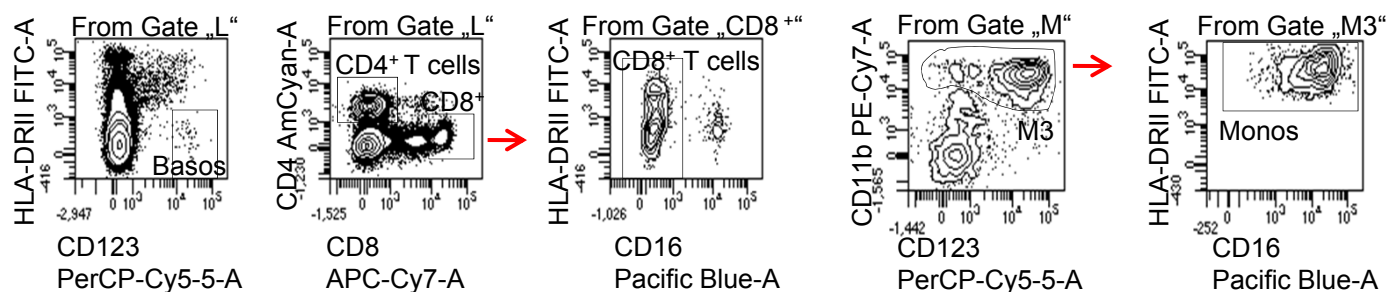

### Panel 1:

| Antibody | Format       |
|----------|--------------|
| CD116    | FITC         |
| CD123    | PE-Cy5       |
| CD131    | PE           |
| CD304    | APC          |
| CD11b    | PE-Cy7       |
| CD193    | APC-Cy7      |
| CD16     | Pacific Blue |
| CD14     | V500         |

### Panel 2:

| Antibody | Format       |
|----------|--------------|
| CD116    | FITC         |
| CD123    | PE-Cy5       |
| CD131    | PE           |
| HLA-DRII | APC          |
| CD8      | PE-Cy7       |
| CD3      | APC-Cy7      |
| CD19     | Pacific Blue |
| CD4      | V500         |

### Panel 3:

| Antibody | Format       |
|----------|--------------|
| CD116    | FITC         |
| CD169    | PE           |
| CD3      | APC-Cy7      |
| CD16     | Pacific Blue |
| CD14     | V500         |

### Panel 4:

| Antibody | Format       |
|----------|--------------|
| HLA-DRII | FITC         |
| CD123    | PE-Cy5       |
| CD131    | PE           |
| CD25     | APC          |
| CD11b    | PE-Cy7       |
| CD8      | APC-Cy7      |
| CD16     | Pacific Blue |
| CD4      | V500         |

**Suppl. Fig. 10**

**Supplementary Fig. 10 Gating strategy to detect key leukocyte subpopulations by flow cytometry.** (a) Gating strategy of single cells. (b) Panel 1: Gating strategy to identify pDCs, basophils, neutrophils and CD14<sup>+</sup> monocytes, CD16<sup>+</sup> monocytes used for Fig. 1a-f, Fig. 3, Fig. Fig. 4 a-d, Suppl. Fig.1a-d, Suppl. Fig. 2a-d, Suppl. Fig. 3, Suppl. Fig. 4a-d, Suppl. Fig. 5, Suppl. Fig. 6a-b, Suppl. Fig. 7a-d, Suppl. Fig. 9. (c) Panel 2: Gating strategy to identify CD4<sup>+</sup> and CD8<sup>+</sup> T cells used for Fig. 2a-b. (d) Panel 3: Gating strategy to identify CD14<sup>+</sup> monocytes and CD16<sup>+</sup> monocytes used for Fig. 4e-h. (e) Panel 4: Gating strategy to identify basophils, CD4<sup>+</sup> T cells and CD8<sup>+</sup> T cells and monocytes from cultured PBMCs (Suppl. Fig. 8a-d).

|                                              | Healthy | Covid-19<br>all | Covid-19<br>non-ventilated | Covid-19<br>ventilated<br>all | Covid-19<br>ventilated<br>survived | Covid-19<br>ventilated<br>dead |
|----------------------------------------------|---------|-----------------|----------------------------|-------------------------------|------------------------------------|--------------------------------|
| <b>Laboratory values:<br/>(demographics)</b> |         |                 |                            |                               |                                    |                                |
| Number of samples (n)                        | 42      | 188             | 68                         | 120                           | 101                                | 19                             |
| Number of patients (n)                       | 42      | 55              | 39 #                       | 30                            | 23                                 | 7                              |
|                                              |         |                 |                            |                               |                                    |                                |
| <b>Laboratory values:<br/>(mean)</b>         |         |                 |                            |                               |                                    |                                |
| Procalcitonin (ng/ml)                        |         | 1.6             | 1.1                        | 1.7                           | 1.1                                | 4.5 <sup>1</sup>               |
| CRP (mg/l)                                   |         | 69.6            | 35.6                       | 86.1 <sup>2</sup>             | 76.1                               | 141,2 <sup>3</sup>             |
| IL-6 (pg/ml)                                 |         | 85.0            | 23.9                       | 94.3                          | 71.1                               | 216,4 <sup>4</sup>             |
| Ferritin (ng/ml)                             |         | 2721.9          | 1158.2                     | 3018.5                        | 1561.6                             | 10950,4 <sup>5</sup>           |
| LDH                                          |         | 340.2           | 273.9                      | 370.6 <sup>6</sup>            | 361.1                              | 423,3                          |
| ALAT (U/L)                                   |         | 75.0            | 62.9                       | 80.7                          | 74.0                               | 116,6 <sup>7</sup>             |
| Bilirubin (mg/dl)                            |         | 2.2             | 0.9                        | 2.8 <sup>8</sup>              | 0.9                                | 12,5 <sup>9</sup>              |
| CK (U/L)                                     |         | 125.7           | 65.5                       | 153.1                         | 156.7                              | 132,6                          |
| D-Dimer (mg/L)                               |         | 8.2             | 4.0                        | 8.6 <sup>10</sup>             | 9.0                                | 6,4                            |
| Leucocytes (/nl)                             |         | 13.0            | 11,4                       | 13.8                          | 11.5                               | 25,8 <sup>11</sup>             |

# 14 patients were sampled on ventilation and also after weaning.

<sup>1</sup> p=0.0011; <sup>2</sup> p=0.0001; <sup>3</sup> p=0.0052; <sup>4</sup> p= 0.0008; <sup>5</sup> p< 0.0001; <sup>6</sup> p= 0.0002; <sup>7</sup> p=0.0210; <sup>8</sup> p= 0.0420; <sup>9</sup> p< 0.0001;

<sup>10</sup> p= 0,0317; <sup>11</sup> p= 0.0006

## Suppl. Tab. 1

**Supplementary Tab. 1 Clinical laboratory characteristics of COVID-19 patients and healthy controls.** COVID-19 patients were sub-grouped into non-ventilated and ventilated patients. Ventilating patients were further sub-grouped into “Survived” and “Dead”. In most patients several consecutive blood samples were available. 14 patients were first sampled on ventilation and also after weaning from ventilation. 2-tailed unpaired t-test was used to calculate statistical differences between non-ventilated and ventilated patients as well as between “Survived” and “Dead” patients. 2-tailed unpaired t-test was used to calculate statistical differences.

|                                              | Virus persistence<br>in days<br>(mean +/- SEM) | Duration of T cell<br>hyporeactivity in days (mean<br>+/- SEM), measured by<br>CD123 upregulation on<br>monocytes | Duration of T cell<br>hyporeactivity in days (mean<br>+/- SEM), measured by<br>CD11b upregulation on<br>neutrophils |
|----------------------------------------------|------------------------------------------------|-------------------------------------------------------------------------------------------------------------------|---------------------------------------------------------------------------------------------------------------------|
| Patients with virus<br>persistence < 15 days | 5.8 (± 1.1)                                    | 5.3 (± 2.7)                                                                                                       | 10.6 (± 3.3)                                                                                                        |
| Patients with virus<br>persistence ≥ 15 days | 31.0 *** (± 3.1)                               | 24.0 ** (± 4.8)                                                                                                   | 23.9 * (± 4.6)                                                                                                      |

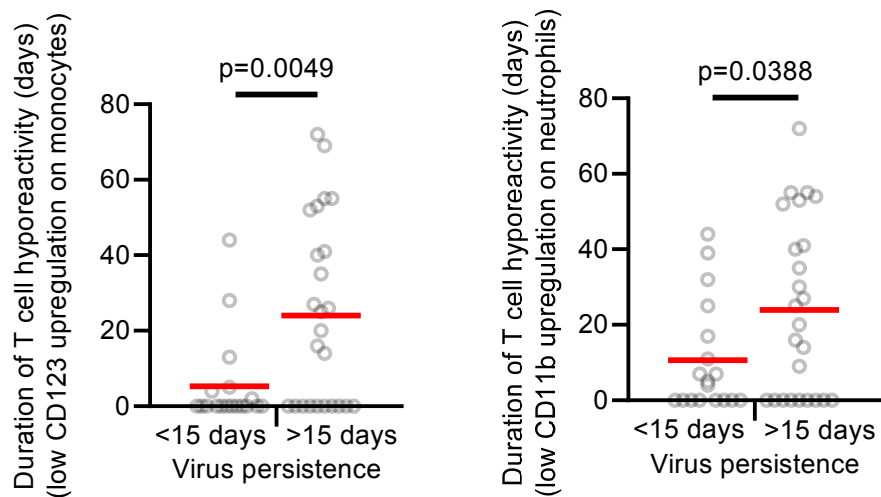

**Suppl. Tab. 2**

**Supplementary Tab. 2 Correlation between persistence of SARS-CoV-2 replication and duration of T cell hyporeactivity.**

Virus persistence was defined as the period from the day of first clinical symptoms to the last day of positive virus RT-PCR. Patients were stratified in two groups by virus persistence <15 days (n=18 biologically independent samples) or  $\geq 15$  days (n=25 biologically independent samples). T cell reactivity was quantified by upregulation of CD123 on monocytes or CD11b on neutrophils as described in Fig. 1. T cell hyporeactivity was defined as an upregulation < 300% for both surface markers. Duration of T cell hyporeactivity was defined as the period from the day of first clinical symptoms to the last day of T cell hyporeactivity.

The figure below shows individual data points for duration of T cell hyporeactivity and virus persistence <15 days or  $\geq 15$  days. 2-tailed unpaired t-test was used to calculate statistical differences between the two groups of patients. Source data are provided as a Source Data file.
